# Supplementary material for: Designing a culturo techno contextual and competency-based education alignment framework and assessment toolkit for evidence-based competency decisions
Source: Research Square preprint supplement (doi:10.21203/rs.3.rs-8512458/v1), 2026-02-05
Supplement: Supplementary file 1 [file d2b204a5c336729352876f07.docx]

**Toolkit Artifacts**

Appendix A. CTCA–CBE Alignment Matrix

Caption: Appendix A. Template and worked example of the CTCA–CBE alignment matrix for undergraduate computing courses.
Brief usage note: Use this matrix to map each competency to CTCA-informed learning design, an authentic performance task, required evidence artifacts, and the rubric criteria used to make mastery decisions. The matrix is completed per course (or per course unit/topic cluster).

| **Programme / Course** | **Competency Code & Statement** | **CTCA Emphasis (C/T/Con)** | **Observable Learning Outcome** | **Learning Activities (CTCA-informed)** | **Performance Task (Authentic)** | **Evidence Required (Artifacts)** | **Tools/Tech Stack** | **Context Constraints & Adaptations** | **Rubric Criteria (IDs)** | **Mastery Threshold (Rule)** | **Feedback & Remediation** |
| --- | --- | --- | --- | --- | --- | --- | --- | --- | --- | --- | --- |
| BSc Computing / Programming I | C1: Develop correct programs using control structures and functions to solve real problems | C: ☑  T: ☑  Con: ☑ | Write a modular program that reads input, applies conditions /loops, and outputs correct results for ≥10 test cases | Locally meaningful scenarios (fees, SACCO savings, boda fare, airtime bundles); pair programming; debugging clinics; offline-first notes | Build a “Student Clearance Checker” CLI app: enter student ID, and payments - outputs clearance status, and outstanding amount using rules | (1) Source code (repo/folder)  (2) README, and usage  (3) Test cases file  (4) Screenshot/ short demo  (5) Reflection notes (failures, and fixes) | Python/Java/C; Git (optional); CLI | If no internet: distribute starter zip; USB submission accepted; offline “versioned folders”; large classes: group-of-2 permitted with individual reflection | R1–R8, and P2 | Mastery: all core ≥3 AND R3 ≥3 (Correctness) | Rubric-marked feedback; remediation: fix top 3 defects, and resubmit within 7 days; targeted micro-task on weak concept |

Key: C = Culture (local relevance); T = Technology (authentic tools); Con = Context (feasibility under constraints).

Appendix B. Computing Competency Rubric (Core, and Course-Specific Add-ons)

Caption: Appendix B. Core rubric for computing performance tasks with selectable course-specific add-on criteria.
Brief usage note: Use the Core Rubric (R1–R8) across most computing courses. Add 2–4 course-specific criteria (P-, D-, S-, N-series) depending on the course. Apply the chosen mastery decision rule consistently.

Appendix B1. Performance Level Scale

- 4 = Mastery: Independent, industry-credible performance; minimal defects; clear rationale and evidence.
- 3 = Proficient: Meets programme standard; minor issues that do not undermine core requirements.
- 2 = Developing: Partial competence; gaps that require improvement before mastery.
- 1 = Beginning: Major gaps; needs substantial support.
- 0 = Not Evident: Missing, irrelevant, or not demonstrated.

| **ID** | **Criterion** | **4 (Mastery)** | **3 (Proficient)** | **2 (Developing)** | **1 (Beginning)** | **0 (Not Evident)** |
| --- | --- | --- | --- | --- | --- | --- |
| R1 | Problem Understanding & Requirements | Interprets requirements fully; identifies constraints, edge cases, and assumptions | Interprets most requirements; minor missed edge cases | Understands basic task; misses key constraints | Misunderstands requirements; unclear assumptions | Missing |
| R2 | Solution Design / Algorithmic Thinking | Clear, efficient design; decomposed modules; justified approach | Reasonable design; some decomposition; minor inefficiencies | Basic design; weak modularity; inefficiencies | No coherent design; trial-and-error | Missing |
| R3 | Correctness & Completeness | Meets all functional requirements; correct across all tests | Meets most requirements; small errors; passes most tests | Some correct outputs; multiple failures | Mostly incorrect/incomplete | Missing |
| R4 | Code Quality / Maintainability | Readable naming; consistent style; modular and reusable | Generally readable; minor style/structure issues | Mixed readability; inconsistent style; limited modularity | Poor readability; tangled logic | Missing |
| R5 | Testing & Debugging | Comprehensive tests incl. edge cases; systematic debugging evidence | Adequate tests; fixes most defects | Few tests; limited debugging approach | No testing approach; unresolved defects | Missing |
| R6 | Documentation & Communication | Clear README/user guide; explains setup, usage, limitations; appropriate comments | Basic documentation; understandable usage steps | Minimal documentation; unclear steps | Missing/very unclear documentation | Missing |
| R7 | Tooling & Workflow | Effective workflow and organized artifacts (e.g., versioning/commits/task evidence) | Basic workflow; artifacts mostly organized | Limited workflow; disorganized artifacts | No meaningful workflow | Missing |
| R8 | Professional Practice (Ethics/Security/Collaboration) | Demonstrates responsible practice; basic security/ethics awareness; fair contribution evidence | Generally responsible; minor issues | Some awareness; inconsistent practice | Neglects professional/ethical practice | Missing |

Appendix B3. Mastery Decision Rules (Select One Per Course)

- Rule A (Strict CBE): Mastery if all selected criteria (core, and add-ons) are ≥3, and R3 ≥3.
- Rule B (Practical CBE): Mastery if average ≥3.0, R3 ≥3, and no more than one criterion at 2.
  (Record the chosen rule in the course guide and apply consistently.)

Appendix B4. Course-Specific Add-on Criteria (Select 2–4)

Programming Add-ons (P-series)

| **ID** | **Criterion** | **4** | **3** | **2** | **1** | **0** |
| --- | --- | --- | --- | --- | --- | --- |
| P1 | Control Structures, Functions, Data Structures | Accurate and appropriate use; clean abstractions | Mostly appropriate; minor misuse | Limited/awkward use; gaps | Incorrect or missing use | Missing |
| P2 | Input Validation & Error Handling | Robust validation and graceful handling | Adequate handling; minor gaps | Limited handling; several gaps | Little/no handling; crashes likely | Missing |
| P3 | Efficiency (Where Relevant) | Efficient approach justified | Reasonably efficient | Some inefficiencies affect performance | Highly inefficient | Missing |

Database Systems Add-ons (D-series)

| **ID** | **Criterion** | **4** | **3** | **2** | **1** | **0** |
| --- | --- | --- | --- | --- | --- | --- |
| D1 | Schema Design & Normalization | Sound design with justified normalization | Mostly sound; minor issues | Several design issues | Poor design | Missing |
| D2 | SQL Correctness & Efficiency | Correct queries; efficient and readable | Correct with minor inefficiencies | Partial correctness; inefficiencies | Mostly incorrect | Missing |
| D3 | Integrity & Security Basics | Strong constraints; access control awareness | Adequate constraints; basic security | Limited constraints/security | Missing integrity/security thinking | Missing |

Software Engineering Add-ons (S-series)

| **ID** | **Criterion** | **4** | **3** | **2** | **1** | **0** |
| --- | --- | --- | --- | --- | --- | --- |
| S1 | Requirements & Traceability | Clear user stories/use cases; traceable to deliverables | Mostly clear; partial traceability | Weak traceability | Unclear requirements | Missing |
| S2 | Architecture/Design Rationale | Sound architecture; justified patterns/tradeoffs | Reasonable design; limited justification | Basic design; weak rationale | Ad hoc design | Missing |
| S3 | Team Process Evidence | Strong evidence (issues, reviews, commits) | Adequate evidence | Limited evidence | No evidence | Missing |

Networks/Cybersecurity Add-ons (N-series)

| **ID** | **Criterion** | **4** | **3** | **2** | **1** | **0** |
| --- | --- | --- | --- | --- | --- | --- |
| N1 | Configuration & Verification | Correct config with verification evidence | Mostly correct; minor issues | Partial config; weak verification | Incorrect config | Missing |
| N2 | Troubleshooting with Evidence | Systematic troubleshooting (logs/captures/commands) | Mostly systematic | Limited evidence | Guesswork | Missing |
| N3 | Control Justification & Risk Awareness | Controls justified against risks | Basic justification | Minimal justification | No risk/control reasoning | Missing |

Appendix C. CTCA–CBE Fidelity Checklist

Caption: Appendix C. Checklist for assessing whether a course design and its assessment system authentically reflect CTCA-guided CBE implementation.
Brief usage note: Use this checklist during course design review, moderation, or peer review. It supports consistent implementation and provides an audit trail for revisions.

Appendix C1. Rating Scale

3 = Strongly Evident, 2 = Evident, 1 = Emerging, 0 = Not Evident

Appendix C2. Checklist Items

| **Domain** | **Item** | **Rating (0–3)** | **Evidence/Comments** |
| --- | --- | --- | --- |
| **CBE Alignment** | Competencies are clearly stated and measurable |  |  |
|  | Each competency maps to at least one performance task |  |  |
|  | Evidence requirements are explicit (what counts as proof) |  |  |
|  | Rubric criteria directly align to competencies |  |  |
|  | Mastery thresholds are defined and communicated |  |  |
| **CTCA—Culture** | Tasks use locally meaningful scenarios/examples |  |  |
|  | Content is inclusive and culturally respectful |  |  |
|  | Learners can connect tasks to community/industry realities |  |  |
| **CTCA—Technology** | Tools reflect authentic computing practice |  |  |
|  | Tooling expectations are feasible and supported |  |  |
|  | Workflow guidance is provided (testing, versioning, documentation) |  |  |
| **CTCA—Context** | Tasks are feasible given class size, lab time, and device access |  |  |
|  | Offline/low-bandwidth alternatives are available |  |  |
|  | Assessment workload is manageable (marking and feedback) |  |  |
| **Assessment Integrity** | Rubric descriptors are clear and observable |  |  |
|  | Inter-rater guidance exists (brief scoring notes/exemplars) |  |  |
|  | Feedback and remediation rules are defined |  |  |
| **Learning Support** | Scaffolding exists (starter code, examples, clinics) |  |  |
|  | Academic integrity guidance is explicit (citation/allowed help) |  |  |

Appendix C3. Optional Fidelity Summary (for reporting)

- Culture subtotal: ___ / 9
- Technology subtotal: ___ / 9
- Context subtotal: ___ / 9
- CBE + Assessment subtotal: ___ / 18
- Overall fidelity: ___ / 45

Suggested interpretation: 0–15 Low, 16–30 Moderate, 31–45 High.

**Appendix D. Performance Task Template (CTCA–CBE)**

Caption: Appendix D. Standard performance task brief template for CTCA-guided CBE assessment in computing.
Brief usage note: Use this template to ensure tasks are competency-driven, culturally relevant, technology-authentic, and feasible under local constraints. Attach the selected rubric and mastery rule.

**Appendix D1. Task Brief Template (Fill-In)**

Course:
Competency Target(s): (codes, and statements)

CTCA Emphasis: Culture ☐ Technology ☐ Context ☐

Task Title:

Local Context Scenario (Culture):

(Describe the real-life local/community/industry problem the task addresses.)

Task Description:

(What the student must build/produce; include boundaries and expected outputs.)

Functional Requirements (Must-Haves):

1.
2.
3.

Non-Functional Requirements (As relevant):

- Performance:
- Usability:
- Security/privacy:
- Reliability:

Deliverables (Evidence Artifacts):

- Source code / project folder
- README/user guide
- Test cases and test results
- Screenshots/demo evidence (if possible)
- Reflection notes (failures encountered + fixes applied)

Tools/Technology (Technology):

(Allowed languages, IDEs, libraries, database engines, network tools, etc.)

Context Constraints & Adaptations (Context):

- Offline submission allowed? (Yes/No; method)
- Device constraints addressed? (Yes/No; approach)
- Group policy? (individual/pairs; accountability method)
- Alternative option if tool access is limited:

Submission Format:

- Naming convention:
- Submission channel:
- Due date:

Assessment and Mastery Rule:

- Core criteria used: R1–R8
- Add-ons used (if any):
- Mastery rule selected: Rule A / Rule B

Academic Integrity Guidance:

(Allowed help, how to cite code/resources, prohibited conduct.)

Feedback and Remediation:

(Resubmission conditions and timelines; minimum improvement expectations.)

**Appendix E. Competency Evidence Log / Portfolio Sheet**

Caption: Appendix E. Evidence log and competency summary template for tracking mastery decisions in CBE computing courses.
Brief usage note: Use the Evidence Log to document artifacts, rubric scores, feedback, and mastery decisions for each student per competency. This supports transparency, moderation, and auditability of competency judgments.

Appendix E1. Evidence Log Template

| **Student ID** | **Student Name** | **Course** | **Competency Code** | **Task Title** | **Evidence Artifact (Link/File)** | **Rubric Scores (Core, and Add-ons)** | **Average / Total** | **Mastery (Y/N)** | **Key Feedback (1–3 lines)** | **Remediation Action** | **Resubmitted (Y/N)** |
| --- | --- | --- | --- | --- | --- | --- | --- | --- | --- | --- | --- |
|  |  |  |  |  |  | R1:__ R2:__ R3:__ R4:__ R5:__ R6:__ R7:__ R8:__ (+___) |  |  |  |  |  |

Appendix E2. Competency Summary (Optional: per student)

| **Competency Code** | **Target Level (e.g., 3)** | **Evidence Count** | **Latest Average Score** | **Mastery Status** | **Notes** |
| --- | --- | --- | --- | --- | --- |
|  |  |  |  |  |  |

Appendix F. How to Apply the CTCA–CBE Toolkit (One-Page Implementation Guide)

Caption: Appendix F. Practical guide for applying the CTCA–CBE alignment and assessment toolkit in undergraduate computing courses.
Brief usage note: This guide is designed for course teams, moderators, and assessors to apply the toolkit consistently within one course cycle.

F1. Purpose

The CTCA–CBE toolkit supports (a) coherent alignment of competencies to learning design and assessment evidence and (b) transparent, rubric-based mastery decisions that reflect cultural relevance, authentic technology practice, and local feasibility constraints.

F2. Step-by-Step Application (Recommended Workflow)

Step 1: Select the Course and Competencies (Week 0)

1. Identify 3–6 core course competencies that must be demonstrated through performance.
2. Write each competency as an assessable statement (action, object, and quality condition).

Output: A list of competency codes and statements (for Appendix A).

Step 2: Complete the CTCA–CBE Alignment Matrix (Week 0–1)

For each competency:

1. Tick CTCA emphasis (Culture/Technology/Context).
2. Define an observable learning outcome (verb, and condition).
3. Specify CTCA-informed activities and an authentic performance task.
4. List required evidence artifacts (what counts as proof).
5. Select rubric criteria (Core R1–R8, and 2–4 add-ons).
6. Choose a mastery rule (Rule A or Rule B).

Output: Completed Appendix A matrix (course version).

Step 3: Design the Performance Task Using the Task Template (Week 1)

1. Write the task brief (Appendix D) with functional/non-functional requirements.
2. List deliverables and submission format.
3. Specify context adaptations (offline submissions, group policy).
4. Attach rubric criteria and mastery threshold.

Output: Performance task brief ready for students.

Step 4: Prepare Assessment Logistics (Before Task Release)

1. Standardize submission naming and evidence format.
2. Create a marking plan: number of assessors, sampling for moderation.
3. Conduct a 30–45-minute assessor calibration using the inter-rater notes (Appendix G).

Output: Shared scoring expectations.

Step 5: Assess Using Rubrics, and Evidence Logs (During Marking)

1. Score using rubric descriptors and Appendix G scoring anchors.
2. Record scores and feedback in the Evidence Log (Appendix E).
3. Apply mastery rule to decide Mastery (Y/N).

Output: Completed Evidence Log and mastery status per student.

Step 6: Feedback and Remediation (After Marking)

1. Provide rubric-marked feedback (1–3 priority improvement points).
2. Apply the remediation pathway (fix-and-resubmit rules) consistently.

Output: Transparent improvement cycle and audit trail.

Step 7: Course Review and Quality Assurance (End of Course)

1. Use the Fidelity Checklist (Appendix C) for a course-level design review.
2. Summarize: competencies covered, mastery rates, recurring gaps, context issues, and proposed revisions.

Output: Course improvement notes for the next offering.

F3. Minimum Compliance Checklist (Course Team)

- Alignment matrix completed for selected competencies (Appendix A)
- At least one authentic performance task per major competency (Appendix D)
- Rubrics attached and mastery rule declared (Appendix B)
- Evidence Log maintained (Appendix E)
- Fidelity Checklist completed by peer/moderator (Appendix C)
- Assessor calibration conducted (Appendix G)

Appendix G. Inter-Rater Scoring Notes (Calibration Anchors for Rubric Criteria)

Caption: Appendix G. Brief inter-rater scoring anchors with examples to improve scoring consistency across assessors.
Brief usage note: Use these examples during assessor calibration before marking and as reference while scoring. They provide practical “anchors” for what commonly qualifies as scores of 4, 3, and 2. (Score 1 is implied as substantially below 2; score 0 is missing.)

Calibration Procedure (recommended 30–45 minutes):

1. All assessors score the same 2 submissions independently.
2. Compare scores criterion-by-criterion; discuss differences.
3. Agree on local interpretation using the anchors below.
4. Document any course-specific scoring decisions.

G1. R1 — Problem Understanding & Requirements

- Score 4 example: Student restates requirements precisely, identifies edge cases (e.g., missing inputs, invalid IDs), states assumptions, and includes constraints (e.g., “offline mode,” “input must be numeric”).
- Score 3 example: Student captures main requirements and handles some edge cases but misses one constraint or assumption.
- Score 2 example: Student addresses the general task but omits key constraints/edge cases; assumptions are unclear or inconsistent.

G2. R2 — Solution Design / Algorithmic Thinking

- Score 4 example: Clear modular design (functions/classes), flow or pseudocode provided; logic is efficient and justified (e.g., avoids duplicated loops).
- Score 3 example: Reasonable structure with some modularity; approach works but has minor inefficiencies or weak rationale.
- Score 2 example: Basic approach with weak structure (monolithic function); algorithm works in parts but lacks clear decomposition.

G3. R3 — Correctness & Completeness

- Score 4 example: Meets all functional requirements; passes all provided tests and includes additional tests; no major defects.
- Score 3 example: Meets most requirements; minor defects (e.g., formatting, one edge case failure) but core functionality works.
- Score 2 example: Partial functionality; several test failures; key requirement missing (e.g., no outstanding balance calculation).

G4. R4 — Code Quality / Maintainability

- Score 4 example: Consistent naming, clean structure, reusable modules; minimal duplication; code is readable to another developer.
- Score 3 example: Generally readable; minor style issues or small duplication; still maintainable.
- Score 2 example: Inconsistent naming/style; cluttered logic; duplication; difficult but not impossible to maintain.

G5. R5 — Testing & Debugging

- Score 4 example: Test cases cover normal and edge scenarios; evidence of debugging (notes/commit messages); errors handled systematically.
- Score 3 example: Adequate tests for typical inputs; some edge cases; limited debugging evidence.
- Score 2 example: Few tests; mostly “happy path”; little debugging evidence; defects remain.

G6. R6 — Documentation & Communication

- Score 4 example: README includes purpose, setup, run commands, sample I/O, limitations; comments clarify complex logic; user steps are clear.
- Score 3 example: Basic README with setup and usage; minor omissions (e.g., missing sample output or limitation note).
- Score 2 example: Minimal README; unclear setup/usage; missing key information; comments sparse or unhelpful.

G7. R7 — Tooling & Workflow

- Score 4 example: Versioned work with meaningful commits; organized repository/folders; task evidence (issues/checklist); reproducible run instructions.
- Score 3 example: Some versioning or organized structure; commits/folders acceptable; limited process evidence.
- Score 2 example: Little workflow evidence; poorly organized submission; no clear versioning; difficult to verify development process.

G8. R8 — Professional Practice (Ethics/Security/Collaboration)

- Score 4 example: Proper attribution for reused code; avoids hardcoding secrets; uses safe input handling; for team tasks, clear contribution evidence.
- Score 3 example: Generally responsible; minor citation/security lapses but no serious issues.
- Score 2 example: Weak attribution; risky practices (e.g., hardcoded credentials in sample); unclear collaboration contributions.

Optional: Inter-Rater Notes for Add-on Criteria (Use if Selected)

G9. P2 — Input Validation & Error Handling (Programming Add-on)

- Score 4 example: Validates all inputs; user-friendly error messages; prevents crashes; handles empty/invalid entries gracefully.
- Score 3 example: Validates most inputs; occasional unhandled case; minor crash risk.
- Score 2 example: Minimal validation; crashes or incorrect behavior for invalid input.

G10. D2 — SQL Correctness & Efficiency (Database Add-on)

- Score 4 example: Queries are correct, efficient, readable; uses joins/indices awareness; avoids unnecessary subqueries.
- Score 3 example: Correct queries with minor inefficiencies; readable structure.
- Score 2 example: Partial correctness or inefficient patterns that affect results/performance.

G11. N2 — Troubleshooting with Evidence (Network/Cybersecurity Add-on)

- Score 4 example: Uses logs/packet captures/command outputs to justify conclusions; step-by-step fault isolation.
- Score 3 example: Some evidence used; reasoning mostly sound; minor gaps.
- Score 2 example: Limited evidence; conclusions not well supported; relies on guesswork.
